# Supplementary material
Source: publisher site journal article supplement (https://www.dovepress.com/article/404421)
Supplement: Supplementary file 1 [file get_supplementary_file.php]

| **Supplementary file-1**  **CASP Randomized Controlled Trial Standard Checklist** | | | | | | | | | | | | | | | | | | |
| --- | --- | --- | --- | --- | --- | --- | --- | --- | --- | --- | --- | --- | --- | --- | --- | --- | --- | --- |
| **Sl.No** | **Name of the Author** | **Ayça Sultan Sahin** | **Carmen Lúcia Kuniyoshi Rebelatto** | **Lei Shi** | | **Lei Shi** | | **Murdani Abdullah** | **G Adas** | **Hamid Reza Aghayan** | | **Rodrigo Pinheiro Araldi** | **Ismail Hadisoebroto Dilogo** | **Najmeh Kafash Farkhad** | **Muhammad Karyana** | **Giacomo Lanzoni** | **Fanping Meng** | **Antoine Monsel** |
| **Section A: Is the basic study design valid for a randomised controlled trial?** | | | | | | | | | | | | | | | | | | |
| 1 | **Did the study address a clearly focused research question?** | | | | | | | | | | | | | | | | | |
|  | • Was the study designed to assess the outcomes of an intervention? | Y | Y | | Y | | Y | | Y | Y | Y | Y | Y | Y | Y | Y | Y | Y |
| • Is the research question ‘focused’ in terms of: PICO |  |  | |  | |  | |  |  |  |  |  |  |  |  |  |  |
| • Population studied | Y | Y | | Y | | Y | | Y | Y | Y | Y | Y | Y | Y | Y | Y | Y |
| • Intervention given | Y | Y | | Y | | Y | | Y | Y | Y | Y | Y | Y | Y | Y | Y | Y |
| • Comparator chosen | Y | Y | | Y | | Y | | Y | Y | Y | Y | Y | Y | Y | Y | Y | Y |
| • Outcomes measured? | Y | Y | | Y | | Y | | Y | Y | Y | Y | Y | Y | Y | Y | Y | Y |
| 2 | **Was the assignment of participants to interventions randomised?** |  |  | |  | |  | |  |  |  |  |  |  |  |  |  |  |
|  | • How was randomisation carried out? Was the method appropriate? | Y | Y | | Y | | Y | | Y | Y | Y | Y | Y | Y | Y | Y | Y | Y |
| • Was randomisation sufficient to eliminate systematic bias? | Y | Y | | Y | | Y | | Y | Y | Y | Y | Y | Y | Y | Y | Y | Y |
| • Was the allocation sequence concealed from investigators and participants? | Y | Y | | Y | | Y | | Y | Y | Y | Y | Y | Y | Y | Y | Y | Y |
| 3 | **Were all participants who entered the study accounted for at its conclusion?** |  |  | |  | |  | |  |  |  |  |  |  |  |  |  |  |
|  | • Were losses to follow-up and exclusions after randomisation accounted for? | Y | Y | | Y | | Y | | Y | Y | Y | Y | Y | Y | Y | Y | Y | Y |
|  | • Were participants analysed in the study groups to which they were randomised (intention-to-treat analysis)? | Y | Y | | Y | | Y | | Y | Y | Y | Y | Y | Y | Y | Y | Y | Y |
|  | • Was the study stopped early? If so, what was the reason? | N | N | | N | | N | | N | N | N | N | N | N | N | N | N | N |
| **Section B: Was the study methodologically sound?** |  |  |  | |  | |  | |  |  |  |  |  |  |  |  |  |  |
| 4 | • Were the participants ‘blind’ to intervention they were given? | N | N | | N | | N | | N | N | N | N | N | N | N | N | N | N |
|  | • Were the investigators ‘blind’ to the intervention they were giving to participants? | N | N | | N | | N | | N | N | N | N | N | N | N | N | N | N |
| • Were the people assessing/analysing outcome/s ‘blinded’? | N | N | | N | | N | | N | N | N | N | N | N | N | N | N | N |
| 5 | **Were the study groups similar at the start of the randomised controlled trial?** | | | | | | | | | | | | | | | | | |
|  | • Were the baseline characteristics of each study group (e.g. age, sex, socio-economic group) clearly set out? | Y | Y | | Y | | Y | | Y | Y | Y | Y | Y | Y | Y | Y | Y | Y |
| • Were there any differences between the study groups that could affect the outcome/s? | N | N | | N | | N | | N | N | N | N | N | N | N | N | N | N |
| 6 | **Apart from the experimental intervention, did each study group receive the same level of care (that is, were they treated equally)?** | | | | | | | | | | | | | | | | | |
|  | • Was there a clearly defined study protocol? | Y | Y | | Y | | Y | | Y | Y | Y | Y | Y | Y | Y | Y | Y | Y |
| • If any additional interventions were given (e.g. tests or treatments), were they similar between the study groups? | Y | Y | | Y | | Y | | Y | Y | Y | Y | Y | Y | Y | Y | Y | Y |
| • Were the follow-up intervals the same for each study group? | Y | Y | | Y | | Y | | Y | Y | Y | Y | Y | Y | Y | Y | Y | Y |
| **Section C: What are the results?** | | | | | | | | | | | | | | | | | | |
| 7 | Were the effects of intervention reported comprehensively? | Y | Y | | Y | | Y | | Y | Y | Y | Y | Y | Y | Y | Y | Y | Y |
|  | • Was a power calculation undertaken? | CNT | CNT | | CNT | | CNT | | CNT | CNT | CNT | CNT | CNT | CNT | CNT | CNT | CNT | CNT |
|  | • What outcomes were measured, and were they clearly specified? | Y | Y | | Y | | Y | | Y | Y | Y | Y | Y | Y | Y | Y | Y | Y |
| • How were the results expressed? For binary outcomes, were relative and absolute effects reported? | Y | Y | | Y | | Y | | Y | Y | Y | Y | Y | Y | Y | Y | Y | Y |
| • Were the results reported for each outcome in each study group at each follow-up interval? | Y | Y | | Y | | Y | | Y | Y | Y | Y | Y | Y | Y | Y | Y | Y |
| • Was there any missing or incomplete data? | N | N | | N | | N | | N | N | N | N | N | N | N | N | N | N |
| • Was there differential drop-out between the study groups that could affect the results? | N | N | | N | | N | | N | N | N | N | N | N | N | N | N | N |
| • Were potential sources of bias identified? | N | N | | Y | | N | | N | N | Y | N | N | N | Y | N | N | N |
| • Which statistical tests were used? | Y | Y | | Y | | Y | | Y | Y | Y | Y | Y | Y | Y | Y | Y | Y |
| • Were p values reported? | Y | Y | | Y | | Y | | Y | Y | Y | Y | Y | Y | Y | Y | Y | Y |
| 8 | **Was the precision of the estimate of the intervention or treatment effect reported?** | | | | | | | | | | | | | | | | | |
|  | • Were confidence intervals (CIs) reported? | Y | Y | | Y | | Y | | Y | Y | Y | Y | Y | Y | Y | Y | Y | Y |
| 9 | **Do the benefits of the experimental intervention outweigh the harms and costs?** | | | | | | | | | | | | | | | | | |
|  | • What was the size of the intervention or treatment effect? | Y | Y | | Y | | Y | | Y | Y | Y | Y | Y | Y | Y | Y | Y | Y |
| • Were harms or unintended effects reported for each study group? | N | N | | N | | N | | N | N | N | N | N | N | N | N | N | N |
| • Was a cost-effectiveness analysis undertaken? (Cost-effectiveness analysis allows a comparison to be made between different interventions used in the care of the same condition or problem.) | N | N | | N | | N | | N | N | N | N | N | N | N | N | N | N |
| **Section D: Will the results help locally?** | |  |  | |  | |  | |  |  |  |  |  |  |  |  |  |  |
| 10 | **Can the results be applied to your local population/in your context?** | | | | | | | | | | | | | | | | | |
|  | • Are the study participants similar to the people in your care? | Y | Y | | Y | | Y | | Y | Y | Y | Y | Y | Y | Y | Y | Y | Y |
| • Would any differences between your population and the study participants alter the outcomes reported in the study? | N | N | | N | | N | | N | N | N | N | N | N | N | N | N | N |
| • Are the outcomes important to your population? | Y | Y | | Y | | Y | | Y | Y | Y | Y | Y | Y | Y | Y | Y | Y |
| • Are there any outcomes you would have wanted information on that have not been studied or reported? | N | N | | N | | N | | N | N | N | N | N | N | N | N | N | N |
| • Are there any limitations of the study that would affect your decision? | N | N | | N | | N | | N | N | N | N | N | N | N | N | N | N |
| 11 | **Would the experimental intervention provide greater value to the people in your care than any of the existing interventions?** | | | | | | | | | | | | | | | | | |
|  | • What resources are needed to introduce this intervention taking into account time, finances, and skills development or training needs? | CNT | CNT | | CNT | | CNT | | CNT | CNT | CNT | CNT | CNT | CNT | CNT | CNT | CNT | CNT |
| • Are you able to disinvest resources in one or more existing interventions in order to be able to re-invest in the new intervention? | CNT | CNT | | CNT | | CNT | | CNT | CNT | CNT | CNT | CNT | CNT | CNT | CNT | CNT | CNT |

**Supplementary file -2**

**PRISMA 2020 Checklist**

| **Section and Topic** | **Item #** | **Checklist item** | **Location where item is reported** |
| --- | --- | --- | --- |
| **TITLE** | | |  |
| Title | 1 | Identify the report as a systematic review. | 1 |
| **ABSTRACT** | | |  |
| Abstract | 2 | See the PRISMA 2020 for Abstracts checklist. | 2-3 |
| **INTRODUCTION** | | |  |
| Rationale | 3 | Describe the rationale for the review in the context of existing knowledge. | 4-11 |
| Objectives | 4 | Provide an explicit statement of the objective(s) or question(s) the review addresses. | 12 |
| **METHODS** | | |  |
| Eligibility criteria | 5 | Specify the inclusion and exclusion criteria for the review and how studies were grouped for the syntheses. | 15 |
| Information sources | 6 | Specify all databases, registers, websites, organisations, reference lists and other sources searched or consulted to identify studies. Specify the date when each source was last searched or consulted. | 13-14 |
| Search strategy | 7 | Present the full search strategies for all databases, registers and websites, including any filters and limits used. | 13-14 |
| Selection process | 8 | Specify the methods used to decide whether a study met the inclusion criteria of the review, including how many reviewers screened each record and each report retrieved, whether they worked independently, and if applicable, details of automation tools used in the process. | 17 |
| Data collection process | 9 | Specify the methods used to collect data from reports, including how many reviewers collected data from each report, whether they worked independently, any processes for obtaining or confirming data from study investigators, and if applicable, details of automation tools used in the process. | 16 |
| Data items | 10a | List and define all outcomes for which data were sought. Specify whether all results that were compatible with each outcome domain in each study were sought (e.g. for all measures, time points, analyses), and if not, the methods used to decide which results to collect. | 16 |
| 10b | List and define all other variables for which data were sought (e.g. participant and intervention characteristics, funding sources). Describe any assumptions made about any missing or unclear information. | 16 |
| Study risk of bias assessment | 11 | Specify the methods used to assess risk of bias in the included studies, including details of the tool(s) used, how many reviewers assessed each study and whether they worked independently, and if applicable, details of automation tools used in the process. | 16 |
| Effect measures | 12 | Specify for each outcome the effect measure(s) (e.g. risk ratio, mean difference) used in the synthesis or presentation of results. | 16-17 |
| Synthesis methods | 13a | Describe the processes used to decide which studies were eligible for each synthesis (e.g. tabulating the study intervention characteristics and comparing against the planned groups for each synthesis (item #5)). | 17-18 |
| 13b | Describe any methods required to prepare the data for presentation or synthesis, such as handling of missing summary statistics, or data conversions. | 18 |
| 13c | Describe any methods used to tabulate or visually display results of individual studies and syntheses. | 34-47 |
| 13d | Describe any methods used to synthesize results and provide a rationale for the choice(s). If meta-analysis was performed, describe the model(s), method(s) to identify the presence and extent of statistical heterogeneity, and software package(s) used. | 34-47 |
| 13e | Describe any methods used to explore possible causes of heterogeneity among study results (e.g. subgroup analysis, meta-regression). | NA |
| 13f | Describe any sensitivity analyses conducted to assess robustness of the synthesized results. | NA |
| Reporting bias assessment | 14 | Describe any methods used to assess risk of bias due to missing results in a synthesis (arising from reporting biases). | NA |
| Certainty assessment | 15 | Describe any methods used to assess certainty (or confidence) in the body of evidence for an outcome. | NA |
| **RESULTS** | | |  |
| Study selection | 16a | Describe the results of the search and selection process, from the number of records identified in the search to the number of studies included in the review, ideally using a flow diagram. | 17 |
| 16b | Cite studies that might appear to meet the inclusion criteria, but which were excluded, and explain why they were excluded. | 19-20 |
| Study characteristics | 17 | Cite each included study and present its characteristics. | 19-20 |
| Risk of bias in studies | 18 | Present assessments of risk of bias for each included study. | Supplementary file |
| Results of individual studies | 19 | For all outcomes, present, for each study: (a) summary statistics for each group (where appropriate) and (b) an effect estimate and its precision (e.g. confidence/credible interval), ideally using structured tables or plots. | NA |
| Results of syntheses | 20a | For each synthesis, briefly summarise the characteristics and risk of bias among contributing studies. | NA |
| 20b | Present results of all statistical syntheses conducted. If meta-analysis was done, present for each the summary estimate and its precision (e.g. confidence/credible interval) and measures of statistical heterogeneity. If comparing groups, describe the direction of the effect. | NA |
| 20c | Present results of all investigations of possible causes of heterogeneity among study results. | NA |
| 20d | Present results of all sensitivity analyses conducted to assess the robustness of the synthesized results. | NA |
| Reporting biases | 21 | Present assessments of risk of bias due to missing results (arising from reporting biases) for each synthesis assessed. | NA |
| Certainty of evidence | 22 | Present assessments of certainty (or confidence) in the body of evidence for each outcome assessed. | 19-20 |
| **DISCUSSION** | | |  |
| Discussion | 23a | Provide a general interpretation of the results in the context of other evidence. | 19-20 |
| 23b | Discuss any limitations of the evidence included in the review. | 20 |
| 23c | Discuss any limitations of the review processes used. | 20 |
| 23d | Discuss implications of the results for practice, policy, and future research. | 20 |
| **OTHER INFORMATION** | | |  |
| Registration and protocol | 24a | Provide registration information for the review, including register name and registration number, or state that the review was not registered. | 14 |
| 24b | Indicate where the review protocol can be accessed, or state that a protocol was not prepared. | 14 |
| 24c | Describe and explain any amendments to information provided at registration or in the protocol. | 14 |
| Support | 25 | Describe sources of financial or non-financial support for the review, and the role of the funders or sponsors in the review. | 21 |
| Competing interests | 26 | Declare any competing interests of review authors. | 21 |
| Availability of data, code and other materials | 27 | Report which of the following are publicly available and where they can be found: template data collection forms; data extracted from included studies; data used for all analyses; analytic code; any other materials used in the review. | 21 |

From: Page MJ, McKenzie JE, Bossuyt PM, Boutron I, Hoffmann TC, Mulrow CD, et al. The PRISMA 2020 statement: an updated guideline for reporting systematic reviews. BMJ 2021;372:n71. doi: 10.1136/bmj.n71

For more information, visit: http://www.prisma-statement.org/
